# Supplementary material for: Evidence for a Xer/dif System for Chromosome Resolution in Archaea
Source: PubMed Central journal article supplement (PMC2958812; doi:10.1371/journal.pgen.1001166), 2010-10-21

Figure S3

## *Thermococcales* predicted *dif* sites and conserved flanking regions

|                         | <i>dif</i>                  |   |   |   |   |          |   |   |   |   |        |   |            |   |   |   |   |                             |   |   |   |   |   |   |   |   |   |   |   |   |   |   |   |   |   |   |   |   |   |   |   |   |   |   |   |   |   |   |   |   |   |   |   |   |   |   |   |   |   |   |   |   |   |   |   |   |   |   |   |   |   |   |   |   |
|-------------------------|-----------------------------|---|---|---|---|----------|---|---|---|---|--------|---|------------|---|---|---|---|-----------------------------|---|---|---|---|---|---|---|---|---|---|---|---|---|---|---|---|---|---|---|---|---|---|---|---|---|---|---|---|---|---|---|---|---|---|---|---|---|---|---|---|---|---|---|---|---|---|---|---|---|---|---|---|---|---|---|---|
|                         | Conserved flanking sequence |   |   |   |   | Left Arm |   |   |   |   | Spacer |   | Righth Arm |   |   |   |   | Conserved flanking sequence |   |   |   |   |   |   |   |   |   |   |   |   |   |   |   |   |   |   |   |   |   |   |   |   |   |   |   |   |   |   |   |   |   |   |   |   |   |   |   |   |   |   |   |   |   |   |   |   |   |   |   |   |   |   |   |   |
| <i>P. horikoshii</i>    | A                           | T | G | T | T | C        | A | T | T | T | T      | T | A          | T | A | T | C | A                           | G | C | C | T | T | A | T | A | T | C | T | A | A | A | A | G | T | A | A | T | G | T | A | T | A | A | A | A | A | T | G | A | A | C | A | T | C | A | A |   |   |   |   |   |   |   |   |   |   |   |   |   |   |   |   |   |
| <i>P. furiosus</i>      | A                           | T | G | C | T | C        | A | T | C | T | A      | T | G          | T | T | A | G | A                           | T | A | T | A | A | T | C | A | G | C | C | T | T | A | T | A | T | C | T | A | A | A | A | A | A | A | A | A | A | A | A | A | A | T | G | A | G | C | G | T | C | G | A |   |   |   |   |   |   |   |   |   |   |   |   |   |
| <i>P. abyssi</i>        | A                           | T | G | C | A | C        | A | T | A | T | T      | T | G          | T | A | T | A | A                           | T | C | G | G | C | C | T | T | A | T | A | T | C | T | A | A | A | A | A | A | A | A | A | A | A | A | A | A | A | T | G | A | G | C | G | T | T | G | A |   |   |   |   |   |   |   |   |   |   |   |   |   |   |   |   |   |
| <i>T. kodakarensis</i>  | G                           | T | G | C | C | A        | T | T | T | T | G      | T | A          | T | A | A | T | G                           | T | A | C | C | C | T | T | A | T | A | T | G | A | C | A | A | A | A | A | A | A | A | A | A | A | A | A | A | A | T | G | A | G | C | A | T | A | G | A |   |   |   |   |   |   |   |   |   |   |   |   |   |   |   |   |   |
| <i>T. onnurineus</i>    | A                           | T | G | T | T | C        | A | A | A | C | A      | T | G          | T | A | T | A | A                           | T | G | T | G | T | C | T | T | A | T | A | T | C | T | A | A | A | A | A | A | A | A | A | A | A | A | A | A | A | T | G | T | G | T | A | T | A | T | G | A |   |   |   |   |   |   |   |   |   |   |   |   |   |   |   |   |
| <i>T. gammatolerans</i> | A                           | T | G | C | T | C        | G | G | A | C | T      | T | G          | A | T | A | T | A                           | T | A | T | A | A | T | G | A | T | C | C | T | T | A | T | A | T | C | T | A | A | A | A | A | A | A | A | A | A | A | A | A | A | A | T | C | C | C | G | T | A | C | A | G | A | T | G | A | A | C | A | T | A | C | A |   |
| <i>T. sibiricus</i>     | T                           | T | G | A | T | T        | T | A | C | A | C      | T | A          | T | A | T | A | A                           | T | A | A | G | C | C | T | T | A | T | A | T | C | T | A | A | A | A | A | A | A | A | A | A | A | A | A | A | A | T | C | A | T | G | C | A | C | A | A | T | A | C | A | T | C | A | T |   |   |   |   |   |   |   |   |   |
| Consensus               | A                           | T | G | Y | T | C        | A | T | W | T | T      | T | G          | T | W | C | R | T                           | T | A | A | T | T | T | A | G | A | T | A | T | A | A | T | S | W | G | C | C | T | T | A | T | A | T | C | T | A | A | A | A | - | T | M | A | T | G | W | A | C | A | A | W | A | A | T | G | A | R | C | R | T | Y | G | A |

Consensus

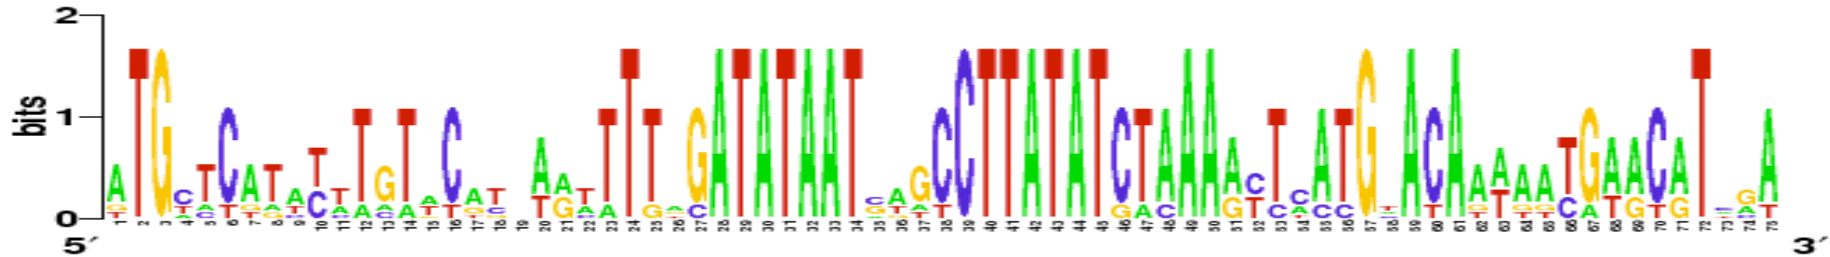

Supplement: pgen.1001166.s003.pdf [file pgen.1001166.s003.pdf]
