# Supplementary material for: Evidence for a Xer/dif System for Chromosome Resolution in Archaea
Source: PLoS Genet. 2010 Oct 21;6(10):e1001166. doi: 10.1371/journal.pgen.1001166 (PMC2958812; doi:10.1371/journal.pgen.1001166)

Figure S7

*Sulfolobales dif* candidates (all within intergenic regions))

|                   |   | dif candidates |   |   |   |   |   |   |   |        |   |   |   |           |   |   |   |   |   |   |   |                             |   |   |   |   |   |   |   | Genomic position | xerA gene | start | end |   |   |   |   |   |   |   |   |           |           |           |           |           |           |
|-------------------|---|----------------|---|---|---|---|---|---|---|--------|---|---|---|-----------|---|---|---|---|---|---|---|-----------------------------|---|---|---|---|---|---|---|------------------|-----------|-------|-----|---|---|---|---|---|---|---|---|-----------|-----------|-----------|-----------|-----------|-----------|
|                   |   | Left Arm       |   |   |   |   |   |   |   | Spacer |   |   |   | Rigth Arm |   |   |   |   |   |   |   | Conserved flanking sequence |   |   |   |   |   |   |   |                  |           |       |     |   |   |   |   |   |   |   |   |           |           |           |           |           |           |
| S. acidocaldarius | 1 | T              | T | T | G | A | G | T | T | A      | A | C | T | C         | C | C | C | A | G | T | T | T                           | A | C | T | G | A | G | A | A                | A         | A     | A   | T | T | C | A | A | C | T |   | 1 238 594 | SacI_1490 | 1 267 333 | 1 268 196 |           |           |
|                   |   |                |   |   |   |   |   |   |   |        |   |   |   |           |   |   |   |   |   |   |   |                             |   |   |   |   |   |   |   |                  |           |       |     |   |   |   |   |   |   |   |   |           |           |           |           |           |           |
| S. tokodaii       | 1 | A              | T | T | C | A | G | T | T | A      | A | C | T | C         | C | C | C | A | G | T | T | T                           | A | C | T | G | A | G | A | A                | A         | A     | A   |   | T | T | C | T | A | T | T | T         |           | 1 313 131 | ST1393    | 1 397 455 | 1 398 309 |
|                   |   |                |   |   |   |   |   |   |   |        |   |   |   |           |   |   |   |   |   |   |   |                             |   |   |   |   |   |   |   |                  |           |       |     |   |   |   |   |   |   |   |   |           |           |           |           |           |           |
| S. solfataricus   | 1 | A              | T | T | G | A | G | T | T | A      | A | C | T | C         | C | C | C | G | G | T | T | A                           | A | C | T | A | A | G | A | A                | A         | A     | A   | C | T | T | T | A | T | A | T |           | 441 160   | SSO0375   | 318 365   | 319 240   |           |
|                   | 2 | A              | T | T | C | A | G | T | T | A      | A | C | T | C         | C | T | C | A | G | T | T | T                           | A | C | T | G | A | G | A | A                | A         | A     | C   | T | G | T | T | T | T | T |   | 479 363   |           |           |           |           |           |

Skews: CACC/GGTG

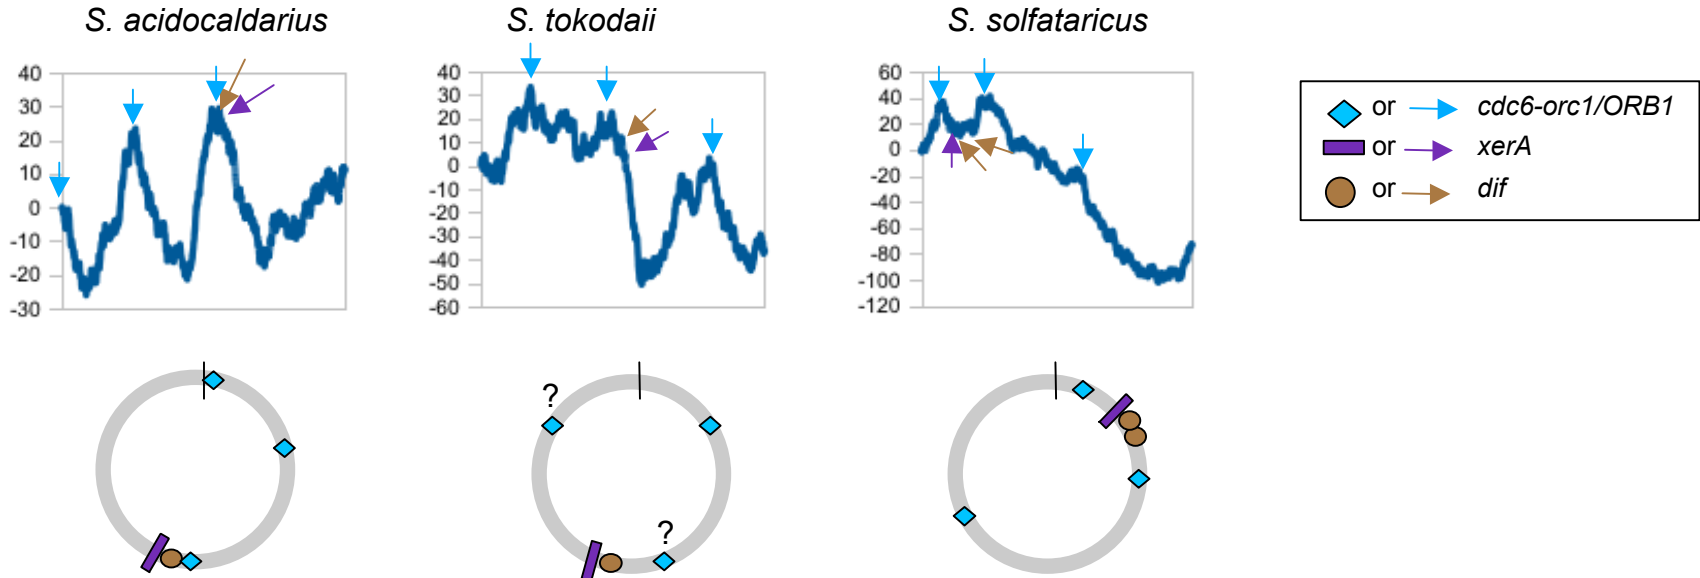

Supplement: Figure S7 — Sulfolobales dif sites. By using the methodology described in the main text of this article on S. solfataricus, S. acidocaldarius and S. tokodaii genomes, one single sequence that fits all of the requirements (two inverted repeats separated by a spacer of 4–8 base pairs, highly conserved between the three genomes and located inside intergenic regions) was found. This potential dif candidate is present only once in S. acidocaldarius and S. tokodaii, but has two copies (only one highly conserved), at the same chromosomal location in S. solfataricus genome. (0.10 MB PDF) [file pgen.1001166.s007.pdf]
