# Supplementary material for: Evidence for a Xer/dif System for Chromosome Resolution in Archaea
Source: PubMed Central journal article supplement (PMC2958812; doi:10.1371/journal.pgen.1001166), 2010-10-21
Supplement: pgen.1001166.s002.pdf [file pgen.1001166.s002.pdf]

**Figure S2****A****Top XerC matches in Archaea**

|                               | <b>length</b> | <b>identity</b> | <b>SW-score</b> | <b>bits</b> |
|-------------------------------|---------------|-----------------|-----------------|-------------|
| <i>P. horikoshii</i>          | 285           | 0.398           | 485             | 116         |
| <i>P. abyssi</i>              | 286           | 0.394           | 481             | 115         |
| <i>P. furiosus</i>            | 286           | 0.377           | 472             | 113         |
| <i>T. kodakaraensis</i>       | 282           | 0.357           | 501             | 120         |
| <i>M. thermoautotrophicum</i> | 311           | 0.336           | 482             | 116         |

---

**Top XerD matches in Archaea**

|                               | <b>length</b> | <b>identity</b> | <b>SW-score</b> | <b>bits</b> |
|-------------------------------|---------------|-----------------|-----------------|-------------|
| <i>P. abyssi</i>              | 286           | 0.371           | 527             | 126         |
| <i>T. kodakaraensis</i>       | 282           | 0.359           | 490             | 118         |
| <i>P. horikoshii</i>          | 285           | 0.352           | 494             | 118         |
| <i>M. thermoautotrophicum</i> | 295           | 0.350           | 489             | 117         |
| <i>P. furiosus</i>            | 286           | 0.350           | 484             | 116         |

---

**B****XerA similarities among *Thermococcales***

|                         | <i>P. abyssi</i> | <i>P. horikoshii</i> | <i>P. furiosus</i> | <i>T. kodakaraensis</i> |
|-------------------------|------------------|----------------------|--------------------|-------------------------|
| <i>P. abyssi</i>        | 100%             |                      |                    |                         |
| <i>P. horikoshii</i>    | 93%              | 100%                 |                    |                         |
| <i>P. furiosus</i>      | 89%              | 89%                  | 100%               |                         |
| <i>T. kodakaraensis</i> | 85%              | 86%                  | 85%                | 100%                    |
