# Supplementary material for: Evidence for a Xer/dif System for Chromosome Resolution in Archaea
Source: PubMed Central journal article supplement (PMC2958812; doi:10.1371/journal.pgen.1001166), 2010-10-21

**Figure S4**

*T. sibiricus* (*dif* candidate found inside the coding region of an hypothetical gene)

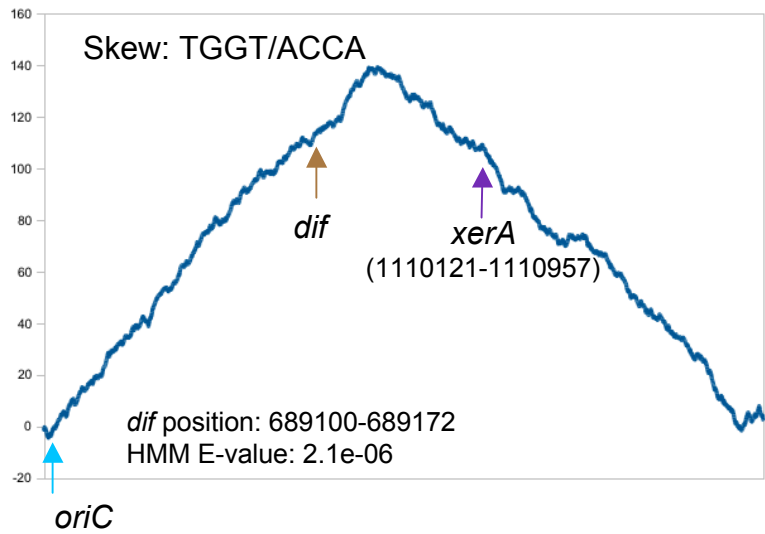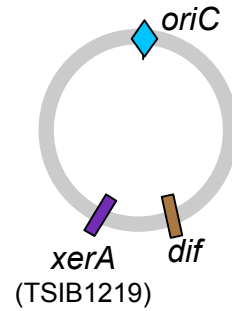

*T. gammatolerans* (*dif* candidate found within an intergenic region)

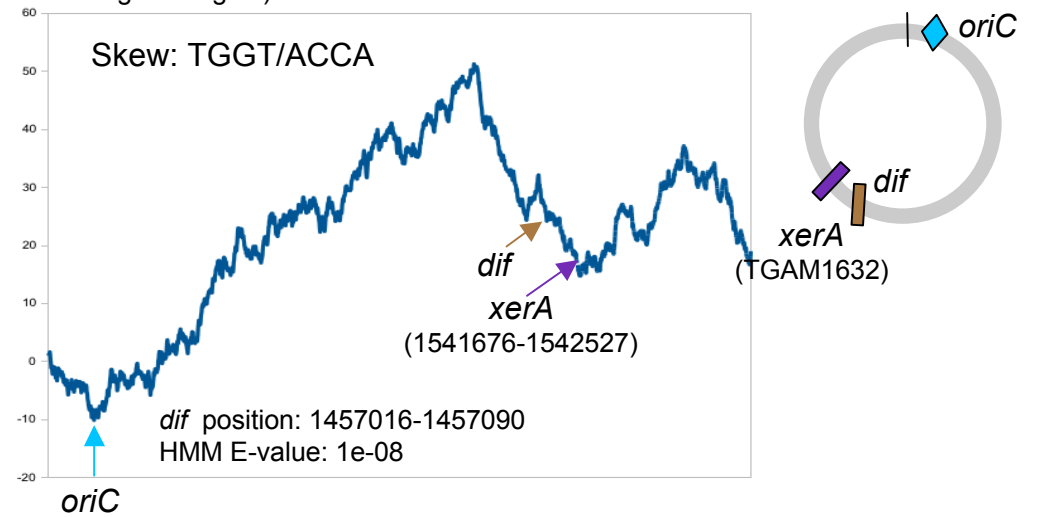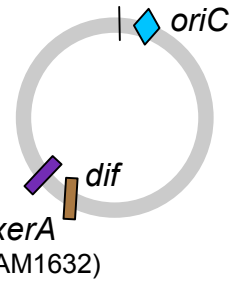

*T. onnurineus* (*dif* candidate found within an intergenic region)

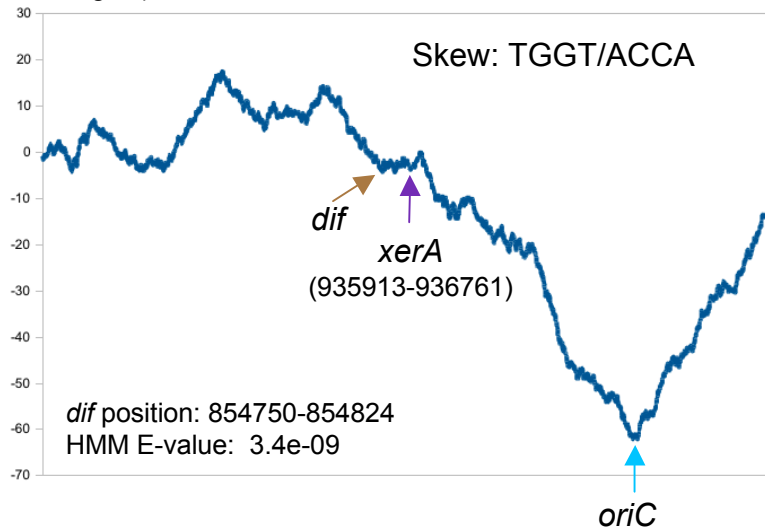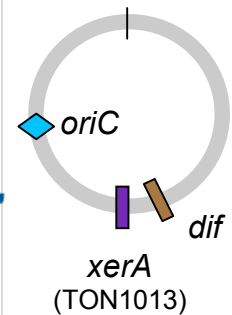

Supplement: pgen.1001166.s004.pdf [file pgen.1001166.s004.pdf]
