# Supplementary material for: Evidence for a Xer/dif System for Chromosome Resolution in Archaea
Source: PubMed Central journal article supplement (PMC2958812; doi:10.1371/journal.pgen.1001166), 2010-10-21

Figure S8

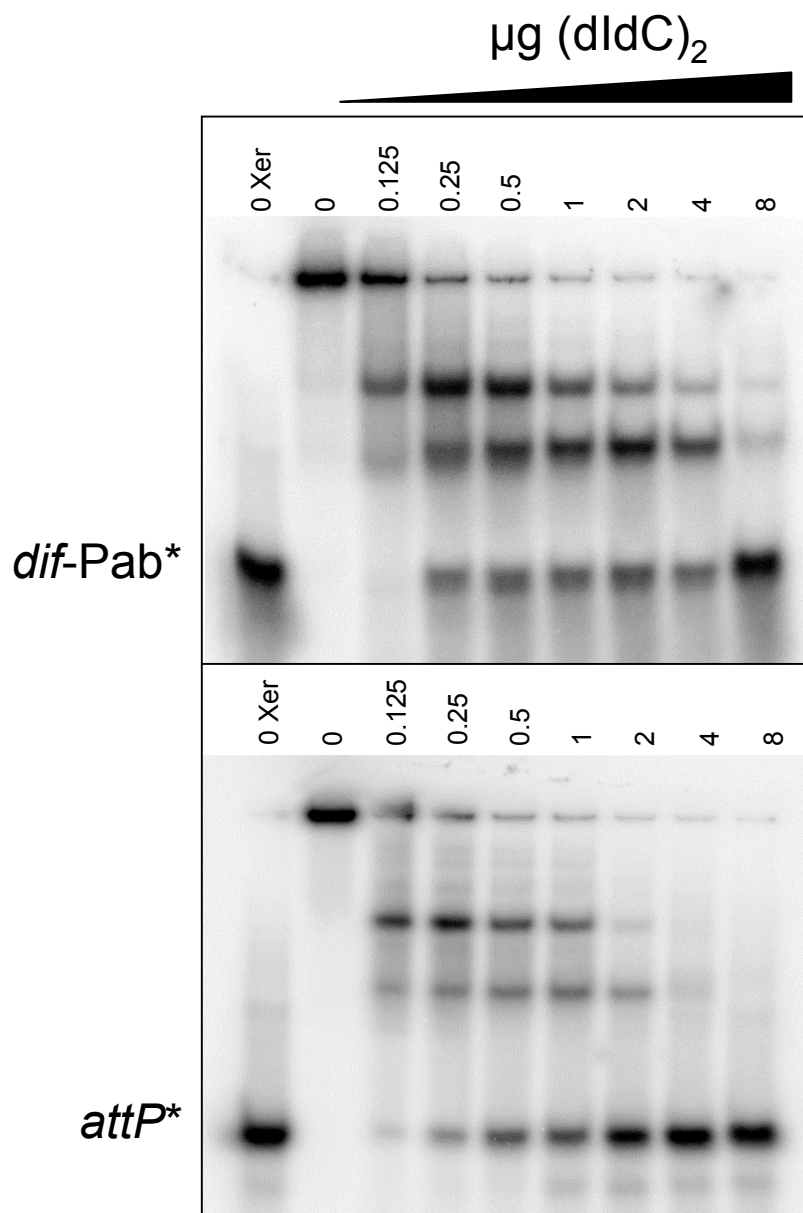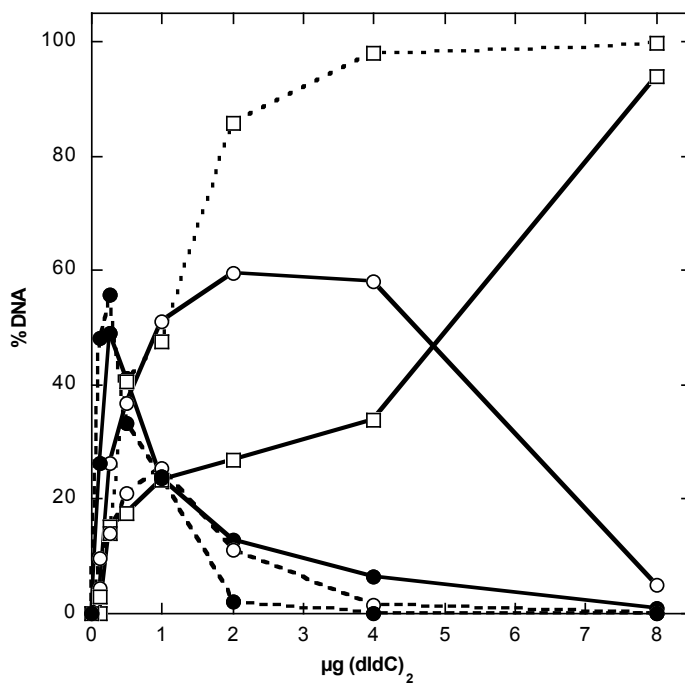

Supplement: pgen.1001166.s008.pdf [file pgen.1001166.s008.pdf]
