# Supplementary material for: Evidence for a Xer/dif System for Chromosome Resolution in Archaea
Source: PubMed Central journal article supplement (PMC2958812; doi:10.1371/journal.pgen.1001166), 2010-10-21

Figure S9

Substrate specificity

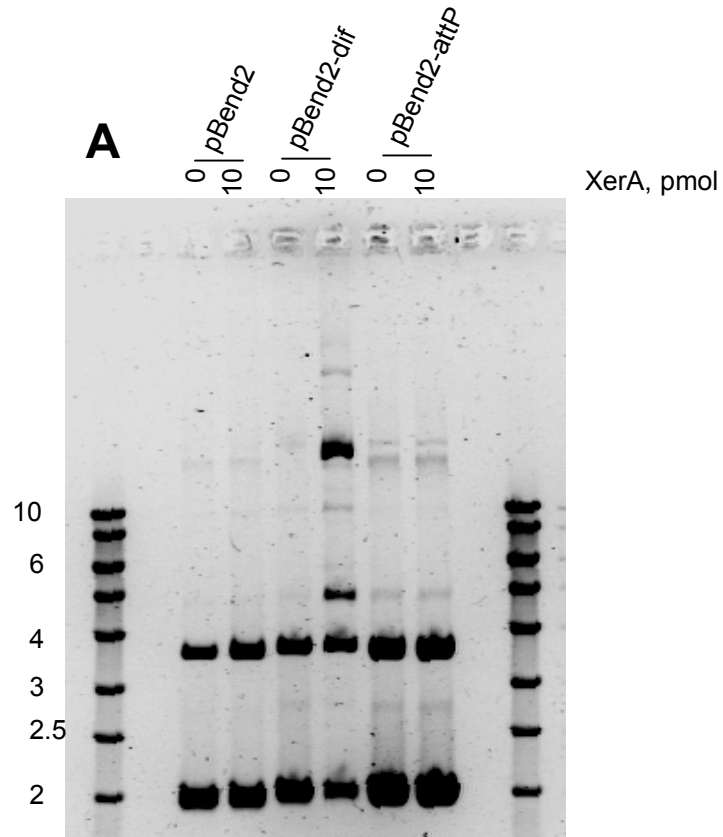

XerA thermostability

**B**

Incubation time (min)

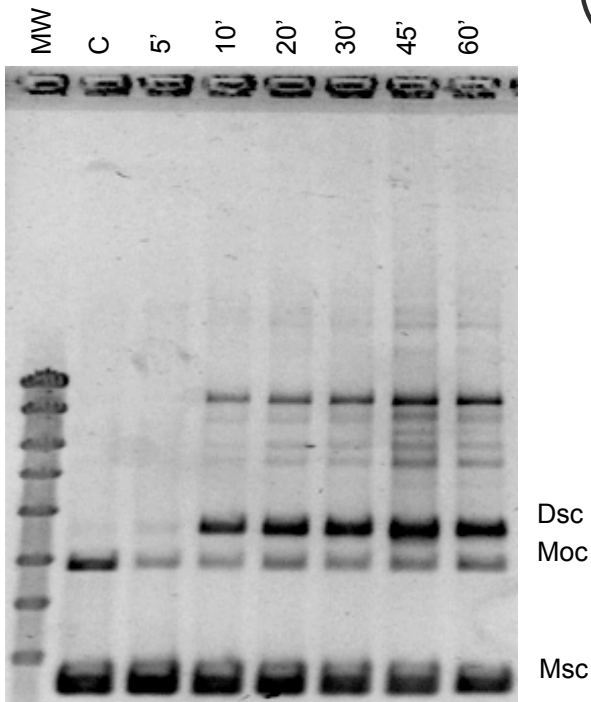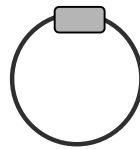

**C**

XerA pre-incubation time (minutes) at 65°C

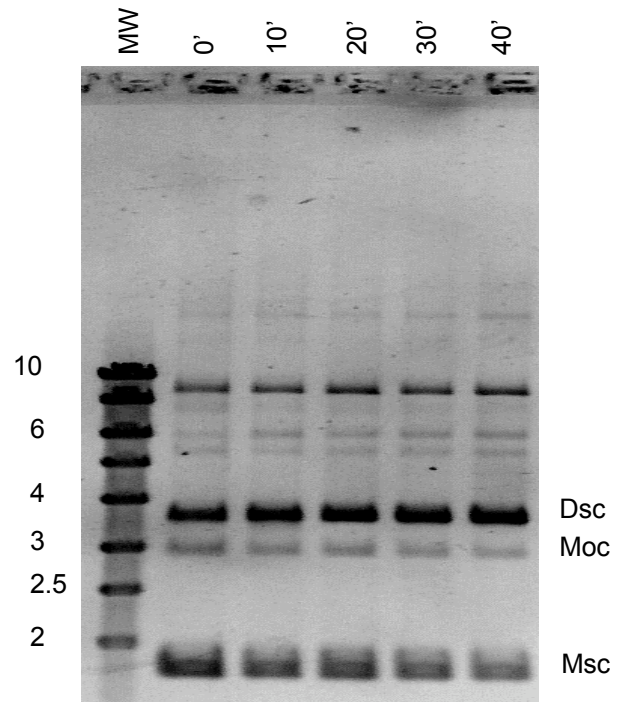

Supplement: pgen.1001166.s009.pdf [file pgen.1001166.s009.pdf]
