# Supplementary material for: Evidence for a Xer/dif System for Chromosome Resolution in Archaea
Source: PubMed Central journal article supplement (PMC2958812; doi:10.1371/journal.pgen.1001166), 2010-10-21
Supplement: pgen.1001166.s010.pdf [file pgen.1001166.s010.pdf]

**Table S1**

**Specific genomic positions of *oriC-cdc6*, *xerA* genes and *dif* sites in  
*Thermococcales* genomes**

|                         | <i>oriC-cdc6</i>                                    | <i>xerA</i> | <i>dif</i> | <i>dif</i> position from<br><i>oriC</i> |
|-------------------------|-----------------------------------------------------|-------------|------------|-----------------------------------------|
| <i>P. abyssi</i>        | 121 402                                             | 372 604     | 1 220 236  | -142°                                   |
| <i>P. horikoshii</i>    | 109 476                                             | 1 587 912   | 736 553    | 135°                                    |
| <i>P. furiosus</i>      | 16 236                                              | 1 724 035   | 659 548    | 122°                                    |
| <i>T. kodakaraensis</i> | 1 712 158                                           | 677 309     | 483 614    | 130°                                    |
| <i>T. onnurineus</i>    | 1 508 116                                           | 935 913     | 854 750    | -127°                                   |
| <i>T. gammatolerans</i> | 125 431                                             | 1 541 676   | 1 457 016  | -132°                                   |
| <i>T. sibiricus</i>     | 13 000 ( <i>oriC</i> )<br>1 434 100 ( <i>cdc6</i> ) | 1 110 121   | 689 100    | 132°                                    |
